# Supplementary material for: CD20 expression regulates CD37 levels in B-cell lymphoma – implications for immunotherapies
Source: PubMed Central journal article supplement — Oncoimmunology. 2024 Jun 4;13(1):2362454. doi: 10.1080/2162402X.2024.2362454 (PMC11155707; doi:10.1080/2162402x.2024.2362454), 2024-06-04

# Supplemental Figure 1

**A**

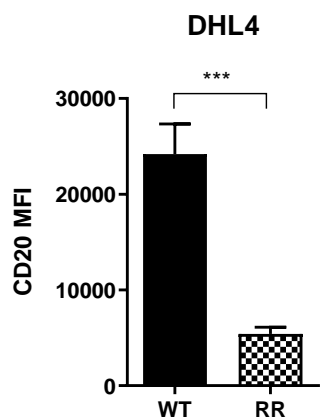

**B**

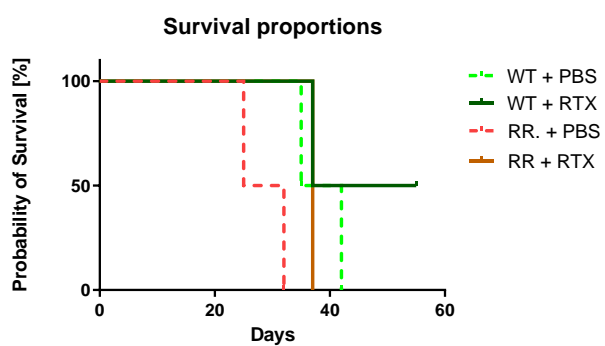

**C**

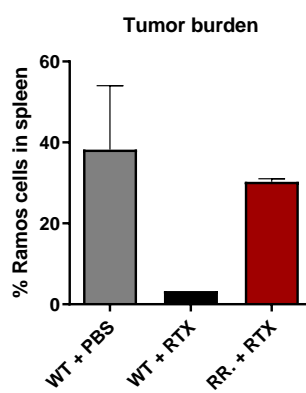

**D**

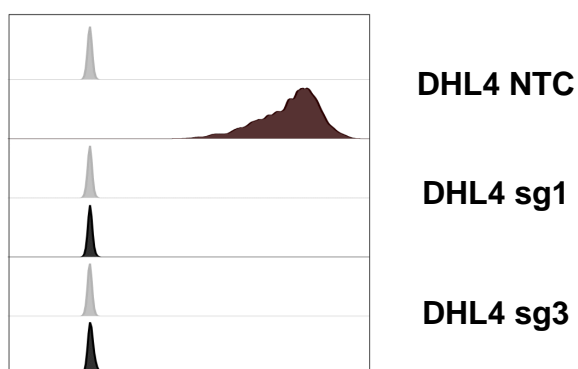

# Supplemental Figure 2

**A**

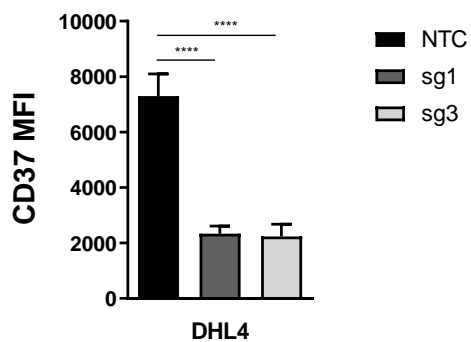

**B**

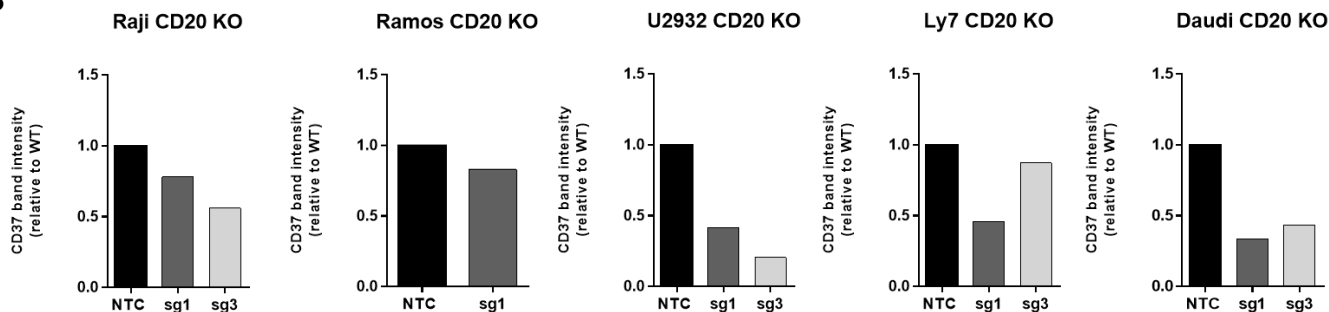

**C**

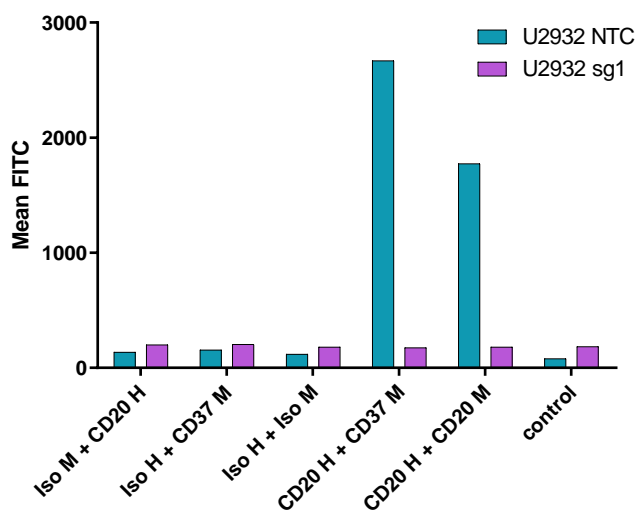

**D**

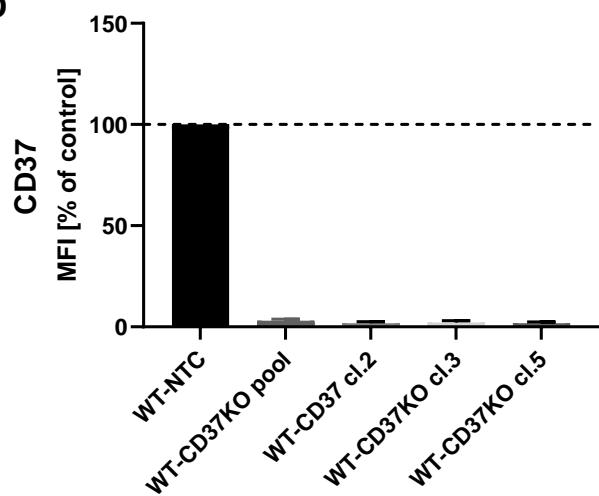

**E**

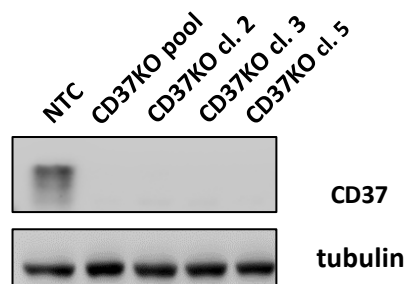

# Supplemental Figure 3

**A**

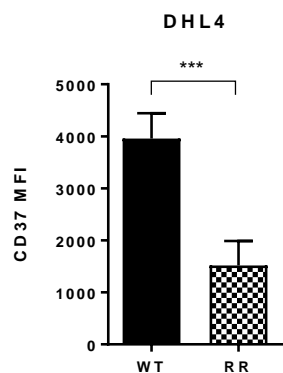

**B**

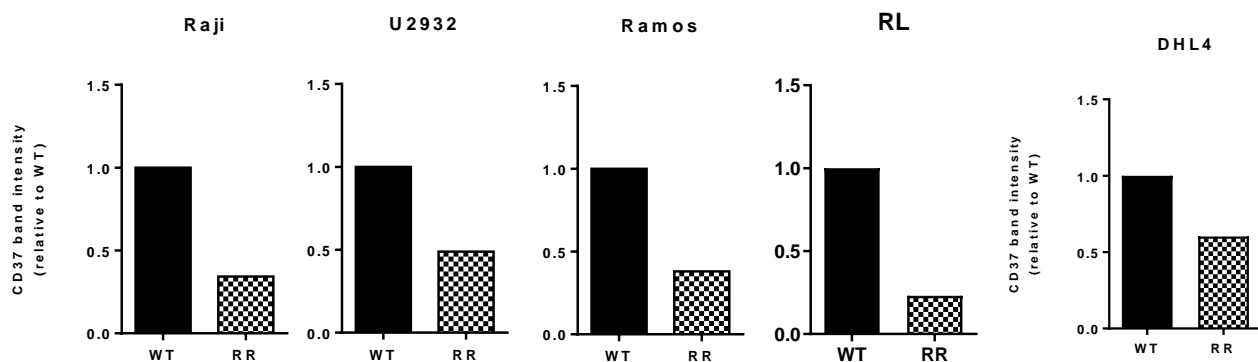

**C**

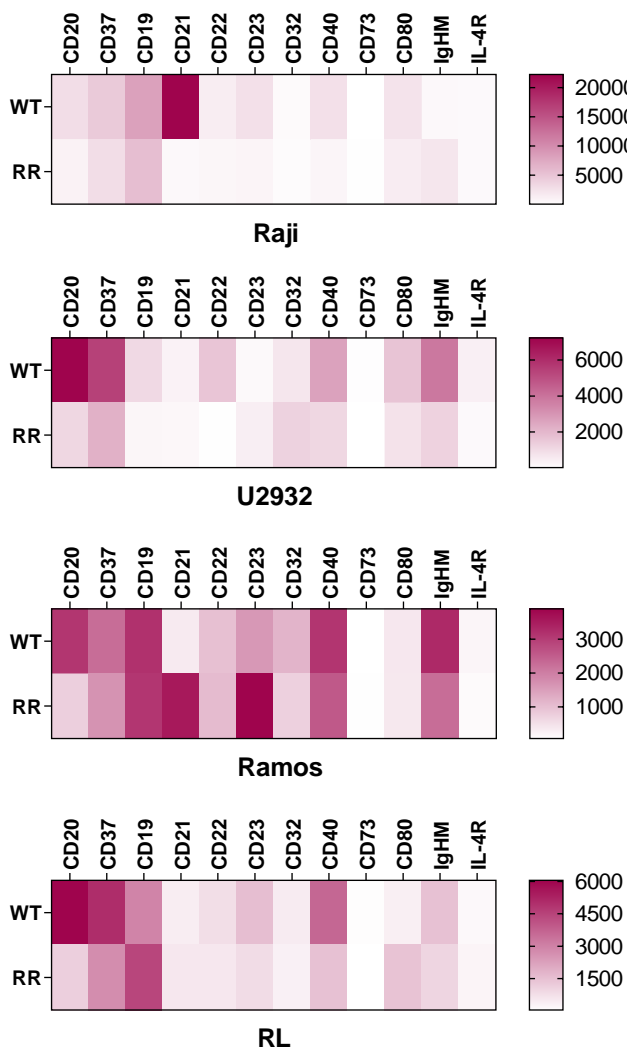

**D**

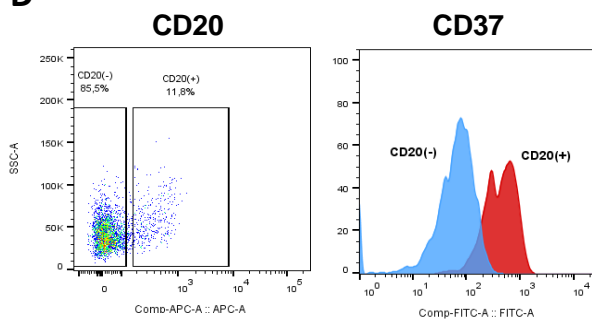

**E**

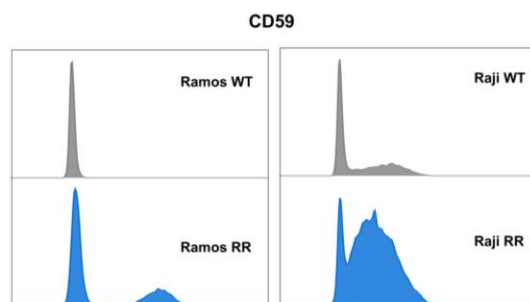

# Supplemental Figure 4

**A**

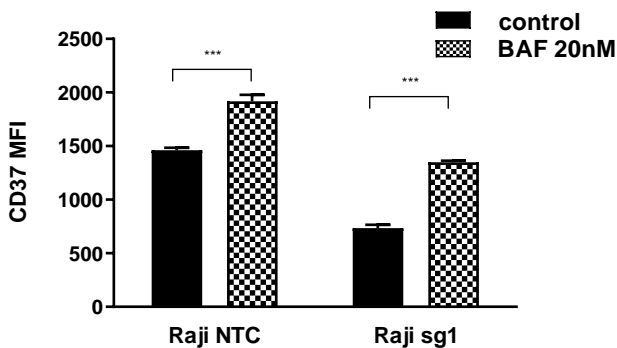

**B**

Raji CD20 KO  
lysosome inhibitors

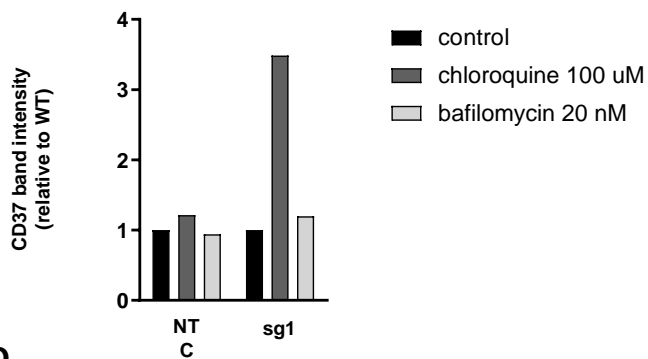

**C**

Raji CD20 KO

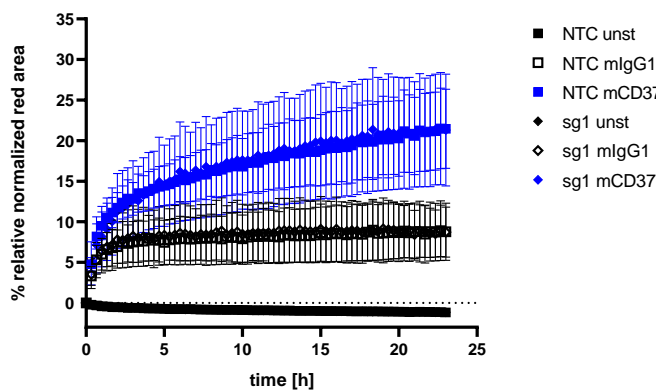

**D**

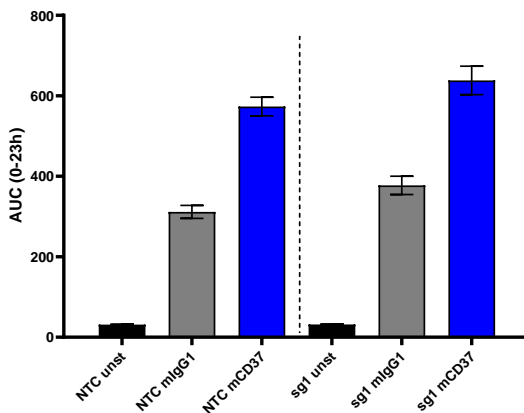

**E**

Log PE Molecules/Bead

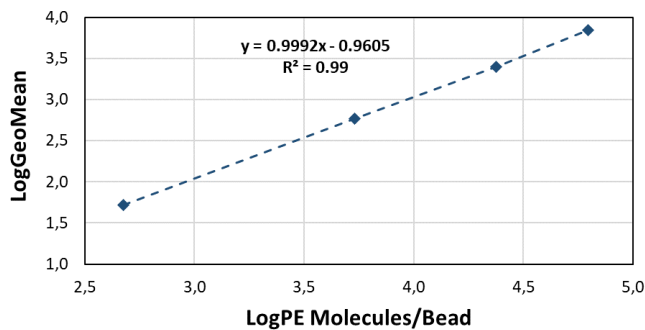

Quantibrite quantification

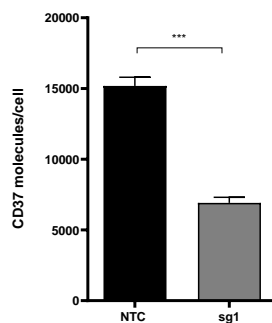

**F**

CD37\_VdC\_1  
96h

CD37\_VC\_1  
96h

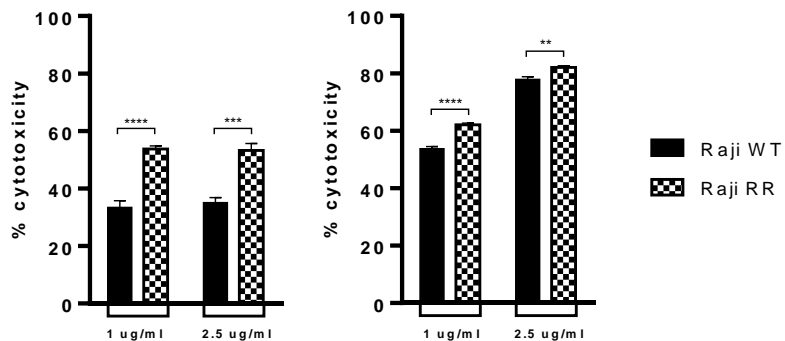

# Supplemental Figure 5

A

CD37 (HH1)

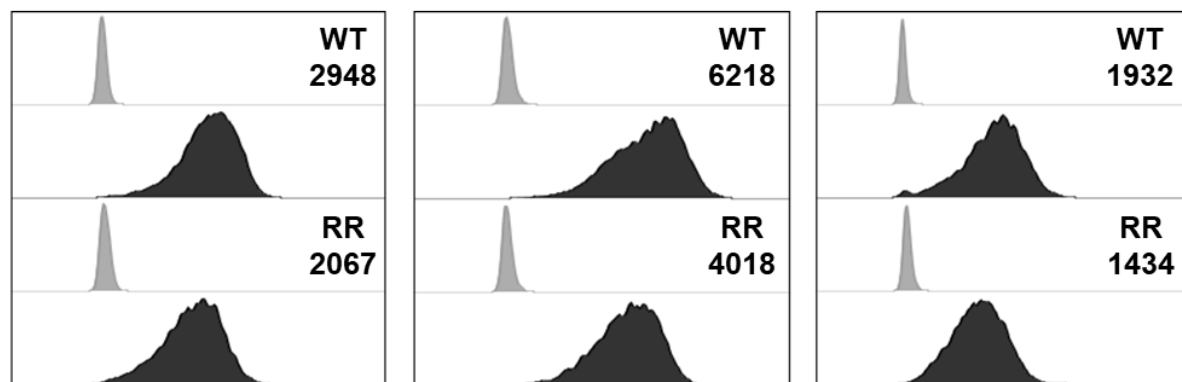

Raji

U2932

RL

B

Raji wt

Raji RR

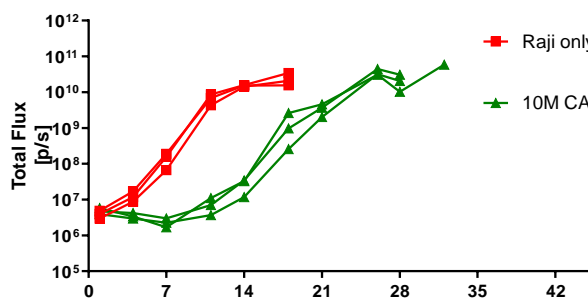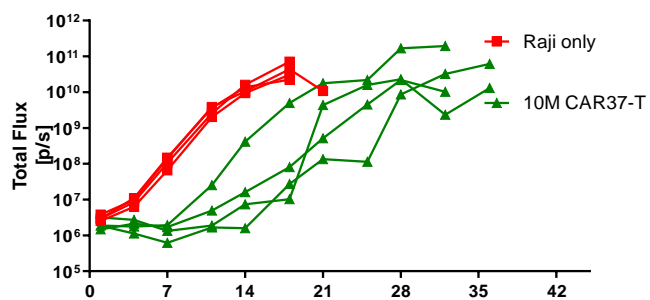

Supplement: KONI_A_2362454_SM7948.pdf [file KONI_A_2362454_SM7948.pdf]
